# Supplementary material
Source: publisher figshare collection journal article supplement (https://frontiersin.figshare.com/ndownloader/files/30718142)
Supplement: Supplementary file [file 30718142]

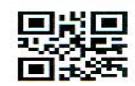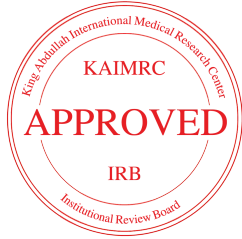**English Version Survey from reference (Pharmacotherapy 2000;20(7):837–843)****Taken with permission**

|    |                                                                          | Not at all | A little bit | Somewhat | Quite a bit | Very much |
|----|--------------------------------------------------------------------------|------------|--------------|----------|-------------|-----------|
| 1  | My pharmacist advises me on the proper use of medicines                  | 0          | 1            | 2        | 3           | 4         |
| 2  | My pharmacist advises me on the adverse (side) effect of medicine        | 0          | 1            | 2        | 3           | 4         |
| 3  | I have confidence in my pharmacist                                       | 0          | 1            | 2        | 3           | 4         |
| 4  | My pharmacist is available to answer my questions                        | 0          | 1            | 2        | 3           | 4         |
| 5  | My pharmacist helps with the arrangement to obtain my medicine           | 0          | 1            | 2        | 3           | 4         |
| 6  | My pharmacist is aware of my treatment-related needs                     | 0          | 1            | 2        | 3           | 4         |
| 7  | My pharmacist respond to treatment-related needs                         | 0          | 1            | 2        | 3           | 4         |
| 8  | How comfortable did you feel in talking with someone by video conference | 0          | 1            | 2        | 3           | 4         |
| 9  | How convenient was the encounter                                         | 0          | 1            | 2        | 3           | 4         |
| 10 | Was the lack of physical appearance of the provider acceptable           | 0          | 1            | 2        | 3           | 4         |
